# Supplementary material for: Clinical characteristics and outcomes in childhood-onset hypertrophic cardiomyopathy
Source: PubMed Central journal article supplement (PMC8139852; doi:10.1093/eurheartj/ehab148), 2021-03-26

## Supplemental Appendix

**Supplemental Table 1: List of Pathogenic and Likely Pathogenic Variants from Each Gene**

| Gene   | c.designation       | p.designation      | Classification | Count |
|--------|---------------------|--------------------|----------------|-------|
| ACTC1  | c.275_277del        | p.Phe92del         | LP             | 1     |
| ACTC1  | c.281A>G            | p.Asn94Ser         | LP             | 1     |
| ACTC1  | c.301G>A            | p.Glu101Lys        | LP             | 1     |
| ACTC1  | c.694G>A            |                    | P              | 1     |
| ACTC1  | c.695C>T            | p.Ala232Val        | P              | 2     |
| ACTC1  | c.69T>A             | p.Phe23Leu         | P              | 1     |
| ACTC1  | c.968C>T            | p.Ala323Val        | LP             | 2     |
| ACTC1  | c.992T>A            | p.Ile331Asn        | P              | 1     |
| MYBPC3 | c.1000G>T           | p.Glu334*          | P              | 3     |
| MYBPC3 | c.1012G>A           | p.Val388Met        | LP             | 1     |
| MYBPC3 | c.1015C>T           | p.Gln339*          | P              | 1     |
| MYBPC3 | c.1020C>G           | p.Tyr340*          | P              | 6     |
| MYBPC3 | c.1053_1054delinsTT |                    | P              | 2     |
| MYBPC3 | c.1090+453C>T       |                    | LP             | 3     |
| MYBPC3 | c.1090G>A           | p.Ala364Thr        | P              | 6     |
| MYBPC3 | c.1091-?_2308+?Del  | p.Phe365-Asp770del | P              | 2     |
| MYBPC3 | c.1112C>G           | p.Pro371Arg        | LP             | 11    |
| MYBPC3 | c.1153_1168del      | p.Val385Metfs*16   | P              | 3     |
| MYBPC3 | c.1168del           | p.His390Metfs*16   | P              | 1     |
| MYBPC3 | c.1171del           | p.Asp391Thrfs*15   | P              | 1     |
| MYBPC3 | c.1174del           | p.Ala392Leufs*14   | P              | 14    |
| MYBPC3 | c.1210C>T           | p.Gln404*          | P              | 7     |
| MYBPC3 | c.1224-2A>G         |                    | P              | 2     |
| MYBPC3 | c.1227-13G>A        |                    | P              | 2     |
| MYBPC3 | c.1227-1G>C         |                    | P              | 1     |
| MYBPC3 | c.1227-2A>G         |                    | P              | 1     |
| MYBPC3 | c.1235_1236del      | p.Phe412*          | P              | 4     |
| MYBPC3 | c.1351+2T>C         |                    | P              | 1     |
| MYBPC3 | c.1354_1355insC     | p.Val454Cysfs*21   | P              | 1     |
| MYBPC3 | c.1359del           | p.Val454Cysfs*12   | P              | 2     |
| MYBPC3 | c.1377del           | p.Leu460Trpfs*6    | P              | 1     |
| MYBPC3 | c.1404del           | p.Gln469fs         | P              | 1     |
| MYBPC3 | c.1456T>G           | p.Trp486Gly        | LP             | 1     |
| MYBPC3 | c.1458-1G>A         |                    | P              | 11    |
| MYBPC3 | c.1458-1G>C         |                    | P              | 10    |
| MYBPC3 | c.1458-6G>A         |                    | LP             | 1     |
| MYBPC3 | c.1483C>G           | p.Arg495Gly        | P              | 5     |
| MYBPC3 | c.1483C>T           | p.Arg495Trp        | P              | 3     |
| MYBPC3 | c.1484G>A           | p.Arg495Gln        | P              | 25    |
| MYBPC3 | c.1504C>T           | p.Arg502Trp        | LP             | 55    |
| MYBPC3 | c.1505G>A           | p.Arg502Gln        | P              | 34    |
| MYBPC3 | c.1509C>G           | p.Phe503Leu        | P              | 2     |
| MYBPC3 | c.1575T>G           | p.Tyr525*          | P              | 2     |
| MYBPC3 | c.1591G>C           | p.Gly531Arg        | LP             | 9     |
| MYBPC3 | c.1624+1G>A         |                    | P              | 6     |
| MYBPC3 | c.1624+4A>T         |                    | P              | 14    |
| MYBPC3 | c.1624G>C           | p.Glu542Gln        | P              | 28    |
| MYBPC3 | c.162del            | p.Lys54Asnfs*13    | P              | 1     |
| MYBPC3 | c.1678del           | p.Asp560Thrfs*19   | P              | 1     |
| MYBPC3 | c.1687del           | p.Val563Cysfs*16   | P              | 1     |
| MYBPC3 | c.1729del           | p.Trp577Alafs*27   | P              | 1     |
| MYBPC3 | c.1755del           | p.Asp587Thrfs*4    | P              | 1     |

|        |                                |                  |    |     |
|--------|--------------------------------|------------------|----|-----|
| MYBPC3 | c.177_187del                   | p.Glu60fs*49     | P  | 4   |
| MYBPC3 | c.1789C>T                      | p.Arg597Trp      | LP | 4   |
| MYBPC3 | c.1790G>A                      | p.Arg597Gln      | LP | 2   |
| MYBPC3 | c.1791-1G>A                    |                  | P  | 1   |
| MYBPC3 | c.1800del                      | p.Lys600Asnfs*2  | P  | 3   |
| MYBPC3 | c.1838dup                      | p.Asp613Glufs*25 | P  | 2   |
| MYBPC3 | c.1892del                      | p.Phe631fs       | P  | 3   |
| MYBPC3 | c.1895del                      | p.Met632Argfs    | P  | 7   |
| MYBPC3 | c.1897+5G>A                    |                  | LP | 2   |
| MYBPC3 | c.1898-1G>A                    |                  | P  | 1   |
| MYBPC3 | c.1900del                      | p.Val634Serfs*29 | P  | 1   |
| MYBPC3 | c.1928-2A>G                    |                  | P  | 24  |
| MYBPC3 | c.1999_2000delinsG             | p.Leu667Thrfs*25 | P  | 2   |
| MYBPC3 | c.2025_2026del                 | p.Asp676Profs*16 | P  | 1   |
| MYBPC3 | c.2048G>A                      | p.Trp683*        | P  | 1   |
| MYBPC3 | c.2073del                      | p.Asn691fs       | P  | 1   |
| MYBPC3 | c.208del                       | p.Glu70fs*25     | P  | 1   |
| MYBPC3 | c.2096del                      | p.Pro699Glnfs*55 | P  | 4   |
| MYBPC3 | c.2113dup                      | p.Thr705Asnfs*3  | P  | 2   |
| MYBPC3 | c.2132G>A                      | p.Trp711*        | P  | 1   |
| MYBPC3 | c.2148+158_2737+258del3548insT |                  | P  | 1   |
| MYBPC3 | c.2149-1G>A                    |                  | P  | 2   |
| MYBPC3 | c.2149-2del                    |                  | P  | 2   |
| MYBPC3 | c.2149-9C>A                    |                  | P  | 5   |
| MYBPC3 | c.2156A>G                      | p.Arg719Gln      | P  | 1   |
| MYBPC3 | c.2157_2158del                 | p.Cys719*        | P  | 1   |
| MYBPC3 | c.2182G>T                      | p.Glu728*        | P  | 1   |
| MYBPC3 | c.2221del                      | p.Ala741Glnfs*13 | P  | 1   |
| MYBPC3 | c.2240_2245delinsCCTTC         | p.Gly747Alafs*7  | P  | 1   |
| MYBPC3 | c.2258dup                      | p.Lys754Glufs*79 | P  | 10  |
| MYBPC3 | c.2259_260insTC                | p.Lys754Serfs*69 | LP | 1   |
| MYBPC3 | c.2267del                      | p.Pro756Leufs*66 | LP | 1   |
| MYBPC3 | c.2267del                      | p.Pro756Leufs*66 | P  | 1   |
| MYBPC3 | c.227_228insA                  | p.Ser78Ilefs*35  | P  | 1   |
| MYBPC3 | c.2274C>T                      | p.Gly758=        | LP | 3   |
| MYBPC3 | c.2302G>A                      |                  | P  | 1   |
| MYBPC3 | c.2304_2308+2del               | p.Ile769Argfs*62 | P  | 1   |
| MYBPC3 | c.2308+1G>A                    |                  | P  | 4   |
| MYBPC3 | c.2308+1G>T                    |                  | P  | 4   |
| MYBPC3 | c.2308+2T>G                    |                  | P  | 1   |
| MYBPC3 | c.2308G>A                      |                  | P  | 9   |
| MYBPC3 | c.2309-2A>G                    |                  | P  | 13  |
| MYBPC3 | c.2371C>T                      | p.Gln791*        | P  | 1   |
| MYBPC3 | c.2373insG                     | p.Trp792Valfs*41 | P  | 142 |
| MYBPC3 | c.2374insG                     | p.Trp792fs       | P  | 1   |
| MYBPC3 | c.2374T>C                      | p.Trp792Arg      | LP | 15  |
| MYBPC3 | c.2376G>A                      | p.Trp792Valfs*41 | P  | 1   |
| MYBPC3 | c.237C>G                       | p.Tyr79*         | P  | 1   |
| MYBPC3 | c.2391C>A                      | p.Tyr797*        | P  | 6   |
| MYBPC3 | c.2413+1G>A                    |                  | P  | 1   |
| MYBPC3 | c.2414-2A>G                    |                  | P  | 1   |
| MYBPC3 | c.2429G>A                      | p.Arg810His      | LP | 15  |
| MYBPC3 | c.2429G>T                      | p.Arg810Leu      | LP | 4   |
| MYBPC3 | c.2454G>A                      | p.Trp818*        | P  | 2   |
| MYBPC3 | c.2459G>A                      | p.Arg820Gln      | LP | 2   |
| MYBPC3 | c.2490dup                      | p.His831Serfs*2  | P  | 1   |

|        |                      |                   |    |    |
|--------|----------------------|-------------------|----|----|
| MYBPC3 | c.25+1G>A            |                   | P  | 2  |
| MYBPC3 | c.2524_2525insT      |                   | P  | 1  |
| MYBPC3 | c.2524:G>A           | p.Trp818*         | P  | 1  |
| MYBPC3 | c.2524G>A            |                   | P  | 1  |
| MYBPC3 | c.2526C>G            | p.Tyr842*         | P  | 1  |
| MYBPC3 | c.2541C>G            | p.Tyr847*         | P  | 2  |
| MYBPC3 | c.2543_2544dup       |                   | P  | 1  |
| MYBPC3 | c.2550del            | p.Asn850Lysfs*29  | P  | 2  |
| MYBPC3 | c.2554insT           | p.Ile852fs*       | P  | 2  |
| MYBPC3 | c.2555_2556insT      | p.Gly853fs        | P  | 1  |
| MYBPC3 | c.2558del            |                   | P  | 2  |
| MYBPC3 | c.2573G>A            | p.Ser858Asn       | LP | 4  |
| MYBPC3 | c.26-2A>G            |                   | P  | 3  |
| MYBPC3 | c.2603-1G>A          |                   | P  | 1  |
| MYBPC3 | c.2604-2605delTCinsA | p.Ser871Alafs*8   | P  | 1  |
| MYBPC3 | c.2670_2671insG      | p.Arg891Alafs*160 | P  | 3  |
| MYBPC3 | c.2670G>A            | p.Trp890*         | P  | 9  |
| MYBPC3 | c.2689_2698del       | p.Gly897Alafs*24  | P  | 6  |
| MYBPC3 | c.2710del            | p.Tyr904Thrfs*20  | P  | 6  |
| MYBPC3 | c.2735del            | p.Gly912Alafs*12  | P  | 4  |
| MYBPC3 | c.2737+2T>A          |                   | P  | 1  |
| MYBPC3 | c.2737+5G>A          |                   | P  | 1  |
| MYBPC3 | c.2738-2A>T          |                   | LP | 1  |
| MYBPC3 | c.2747G>A            | p.Trp916*         | P  | 3  |
| MYBPC3 | c.2780_2781del       | p.Thr927Ilefs*123 | P  | 1  |
| MYBPC3 | c.2792dup            | p.Lys932Glufs*119 | P  | 1  |
| MYBPC3 | c.2827C>T            | p.Arg943*         | P  | 68 |
| MYBPC3 | c.2833_2834del       | p.Arg945Glyfs*105 | P  | 1  |
| MYBPC3 | c.2846dup            | p.Met949Ilefs*102 | P  | 1  |
| MYBPC3 | c.2862_2865del       |                   | P  | 2  |
| MYBPC3 | c.2864_2865del       | p.Pro955Argfs*95  | P  | 54 |
| MYBPC3 | c.2864del            | p.Pro955Argfs*95  | LP | 7  |
| MYBPC3 | c.2869dup            | p.Thr957fs*94     | P  | 1  |
| MYBPC3 | c.2893C>T            | p.Gln965*         | P  | 1  |
| MYBPC3 | c.2905+1G>A          |                   | P  | 9  |
| MYBPC3 | c.2905+5G>T          |                   | P  | 1  |
| MYBPC3 | c.2905C>T            | p.Gln969*         | P  | 8  |
| MYBPC3 | c.292G>C             | p.Glu98*          | P  | 1  |
| MYBPC3 | c.2943_2947del       | p.Gln981fs        | P  | 2  |
| MYBPC3 | c.2992C>T            | p.Gln998*         | P  | 2  |
| MYBPC3 | c.2994+2T>C          |                   | P  | 3  |
| MYBPC3 | c.3029del            | p.Glu1010fs       | P  | 1  |
| MYBPC3 | c.3040del            | p.Leu1014Trpfs*6  | P  | 1  |
| MYBPC3 | c.306_306del         | p.Met103Cysfs*56  | P  | 1  |
| MYBPC3 | c.3065G>C            | p.Arg1022Pro      | LP | 4  |
| MYBPC3 | c.3100del            | p.Ala1034Profs*12 | P  | 1  |
| MYBPC3 | c.3124_3125insAA     | p.Thr1042Lysfs*5  | P  | 2  |
| MYBPC3 | c.3127dup            | p.Tyr1043Leufs*8  | P  | 1  |
| MYBPC3 | c.3129C>A            | p.Tyr1043*        | P  | 1  |
| MYBPC3 | c.3166dup            | p.Lys1055*        | LP | 1  |
| MYBPC3 | c.3181C>T            | p.Gln1061*        | P  | 2  |
| MYBPC3 | c.3190+1G>A          |                   | P  | 3  |
| MYBPC3 | c.3190+2T>G          |                   | LP | 1  |
| MYBPC3 | c.3190+5G>A          |                   | P  | 7  |
| MYBPC3 | c.3192dup            | p.Lys1065Glufs*12 | P  | 38 |
| MYBPC3 | c.3217dup            | p.Arg1073Profs*4  | P  | 1  |

|        |                      |                      |    |    |
|--------|----------------------|----------------------|----|----|
| MYBPC3 | c.3226_3227insT      | p.Asp1076Valfs*6     | P  | 2  |
| MYBPC3 | c.3233G>A            | p.Trp1078*           | P  | 6  |
| MYBPC3 | c.3286G>T            | p.Glu1096*           | P  | 3  |
| MYBPC3 | c.3288del            |                      | P  | 1  |
| MYBPC3 | c.3288G>A            | p.Glu1096*           | P  | 3  |
| MYBPC3 | c.3293G>A            | p.Trp1098*           | P  | 1  |
| MYBPC3 | c.3297dup            | p.Tyr1100Valfs*49    | P  | 1  |
| MYBPC3 | c.3300C>A            | p.Tyr1100*           | P  | 1  |
| MYBPC3 | c.3321dup            | p.Lys1108Glnfs*41    | P  | 1  |
| MYBPC3 | c.3330+2T>C          |                      | P  | 2  |
| MYBPC3 | c.3330+2T>G          |                      | P  | 16 |
| MYBPC3 | c.3330+5G>A          |                      | P  | 1  |
| MYBPC3 | c.3330+5G>C          |                      | P  | 7  |
| MYBPC3 | c.3330+T>G           |                      | P  | 1  |
| MYBPC3 | c.3331-1G>A          |                      | P  | 2  |
| MYBPC3 | c.3331-1G>C          |                      | P  | 3  |
| MYBPC3 | c.3331-2A>G          |                      | P  | 1  |
| MYBPC3 | c.3332_3335dup       | p.Trp1112Leufs*37    | P  | 1  |
| MYBPC3 | c.3334dup            | p.Trp1112Leufs*37    | P  | 1  |
| MYBPC3 | c.3335G>A            | p.Trp1112*           | P  | 1  |
| MYBPC3 | c.3350+5G>C          |                      | P  | 1  |
| MYBPC3 | c.3372C>A            | p.Cys1124*           | P  | 2  |
| MYBPC3 | c.3414_3415insC      | p.Val1139Argfs*10    | P  | 2  |
| MYBPC3 | c.3432_3435dup       | p.Phe1147Trpfs*3     | P  | 2  |
| MYBPC3 | c.3467dup            | p.Pro1157Alafs*12    | P  | 1  |
| MYBPC3 | c.3476_3477insATTT   | p.Phe1159Leufs*11    | P  | 1  |
| MYBPC3 | c.3490+1G>A          |                      | P  | 2  |
| MYBPC3 | c.3490+1G>T          |                      | P  | 3  |
| MYBPC3 | c.3490+5G>A          |                      | P  | 1  |
| MYBPC3 | c.3514_3517dup       | p.Lys1173Ilefs*2     | P  | 2  |
| MYBPC3 | c.3617_3618del       | p.Gly1206Glnfs*35    | P  | 1  |
| MYBPC3 | c.3617del            | p.Gly1206Valfs*31    | P  | 5  |
| MYBPC3 | c.3624_3625insC      | p.Lys1209Glnfs*33    | P  | 5  |
| MYBPC3 | c.3624del            | p.Lys1209Glnfs*28    | P  | 8  |
| MYBPC3 | c.3627+1G>A          |                      | P  | 1  |
| MYBPC3 | c.3627+2T>G          |                      | P  | 1  |
| MYBPC3 | c.3628-1G>A          |                      | P  | 1  |
| MYBPC3 | c.3628-41_3628-17del |                      | P  | 10 |
| MYBPC3 | c.362del             | p.Pro121Argfs*38     | P  | 1  |
| MYBPC3 | c.3642G>A            | p.Trp1214*           | P  | 1  |
| MYBPC3 | c.3662_3662del       | p.Leu1221Argfs*16    | P  | 2  |
| MYBPC3 | c.3690_3691del       | p.Phe1230Leufs*11    | P  | 1  |
| MYBPC3 | c.3694A>T            | p.Lys1232*           | P  | 1  |
| MYBPC3 | c.3697C>T            | p.Gln1233*           | P  | 21 |
| MYBPC3 | c.3697C>T            | p.Gln1233*           | P  | 1  |
| MYBPC3 | c.3702_3703del       | p.Leu1236fs          | P  | 1  |
| MYBPC3 | c.3712_3713del       | p.Leu1238Glyfs*3     | P  | 1  |
| MYBPC3 | c.3713T>C            | p.Leu1238Pro         | LP | 1  |
| MYBPC3 | c.3742_3759dup       | p.Gly1248_Cys1253dup | P  | 7  |
| MYBPC3 | c.3742_3759dup18     | p.Gly1248_cys1253Dup | P  | 1  |
| MYBPC3 | c.3767_3768del       | p.Thr1256Lysfs*9     | P  | 2  |
| MYBPC3 | c.3771C>A            | p.Asn1257Lys         | LP | 2  |
| MYBPC3 | c.3776del            | p.Gln1259fs          | P  | 10 |
| MYBPC3 | c.3811C>T            | p.Arg1271*           | P  | 3  |
| MYBPC3 | c.3814+1G>A          |                      | P  | 1  |
| MYBPC3 | c.3815-1G>A          |                      | P  | 1  |

|        |                           |                     |    |     |
|--------|---------------------------|---------------------|----|-----|
| MYBPC3 | c.3G>C                    | p.Met1?             | P  | 1   |
| MYBPC3 | c.3G>Exon1                | p.Met1?             | P  | 1   |
| MYBPC3 | c.407-1G>A                |                     | P  | 1   |
| MYBPC3 | c.410C>G                  | p.Ser137*           | P  | 1   |
| MYBPC3 | c.436_437insA             | p.Thr146fs          | P  | 1   |
| MYBPC3 | c.459del                  | p.Ile154Leufs*5     | P  | 4   |
| MYBPC3 | c.481C>T                  | p.Pro161Ser         | P  | 9   |
| MYBPC3 | c.505+1G>A                |                     | P  | 1   |
| MYBPC3 | c.506-1G>A                |                     | P  | 1   |
| MYBPC3 | c.506-2A>C                |                     | P  | 4   |
| MYBPC3 | c.540_559del              | p.Ala181Cysfs*53    | P  | 1   |
| MYBPC3 | c.551dup                  | p.Lys185Glu*56      | P  | 2   |
| MYBPC3 | c.553A>T                  | p.Lys185*           | P  | 1   |
| MYBPC3 | c.613C>T                  | p.Gln205*           | P  | 1   |
| MYBPC3 | c.65_66insG               | p.Ala23Argfs*26     | P  | 1   |
| MYBPC3 | c.654+1G>A                |                     | P  | 4   |
| MYBPC3 | c.655-?_*26=?Del          | p.Val219-Gln1274del | P  | 1   |
| MYBPC3 | c.655-1G>A                |                     | P  | 1   |
| MYBPC3 | c.655G>C                  | p.Val219Leu         | P  | 6   |
| MYBPC3 | c.676_701dup26            | p.Gly235fs          | P  | 1   |
| MYBPC3 | c.688del                  | p.Gln230fs          | P  | 3   |
| MYBPC3 | c.710A>C                  | p.Tyr237Ser         | P  | 1   |
| MYBPC3 | c.772G>A                  | p.Glu258Lys         | P  | 155 |
| MYBPC3 | c.772G>Ap.Glu258Lys,Exon6 |                     | P  | 1   |
| MYBPC3 | c.772G>C                  |                     | P  | 1   |
| MYBPC3 | c.821+1G>A                |                     | P  | 12  |
| MYBPC3 | c.821+1G>C                |                     | P  | 1   |
| MYBPC3 | c.840_851+5del17          |                     | P  | 1   |
| MYBPC3 | c.897del                  | p.Lys301fs          | P  | 2   |
| MYBPC3 | c.913_914del              | p.Phe305Profs*27    | P  | 17  |
| MYBPC3 | c.927-10C>A               |                     | LP | 1   |
| MYBPC3 | c.927-10C>T               |                     | LP | 2   |
| MYBPC3 | c.927-1G>C                |                     | P  | 1   |
| MYBPC3 | c.927-2A>G                |                     | P  | 8   |
| MYBPC3 | c.927-9G>A                |                     | P  | 24  |
| MYBPC3 | c.932C>A                  | p.Ser311*           | P  | 1   |
| MYBPC3 | c.95del                   | p.Glu32Glyfs*7      | P  | 1   |
| MYBPC3 | c.966G>A                  | p.Trp322*           | P  | 1   |
| MYBPC3 | c.989del                  | p.Pro330Hisfs*20    | P  | 1   |
| MYBPC3 | c.993dup                  | p.Glu332*           | P  | 1   |
| MYBPC3 |                           | p.Leu1221Argfs*16   | P  | 1   |
| MYH7   | c.1012G>A                 | p.Val338Met         | LP | 4   |
| MYH7   | c.1013T>C                 | p.Val338Ala         | LP | 1   |
| MYH7   | c.1063G>A                 | p.Ala355Thr         | P  | 2   |
| MYH7   | c.1193G>A                 | p.Gly398Glu         | LP | 2   |
| MYH7   | c.1193G>A                 | p.Gly398Glu         | P  | 1   |
| MYH7   | c.1207C>T                 | p.Arg403Trp         | P  | 5   |
| MYH7   | c.1208G>A                 | p.Arg403Gln         | LP | 1   |
| MYH7   | c.1208G>A                 | p.Arg403Gln         | P  | 20  |
| MYH7   | c.1324C>T                 | p.Arg442Cys         | P  | 8   |
| MYH7   | c.1331A>G                 | p.Asn444Ser         | P  | 1   |
| MYH7   | c.1357C>T                 | p.Arg453Cys         | LP | 3   |
| MYH7   | c.1357C>T                 | p.Arg453Cys         | P  | 11  |
| MYH7   | c.1358G>A                 | p.Arg453His         | LP | 1   |
| MYH7   | c.1358G>A                 | p.Arg453His         | P  | 1   |
| MYH7   | c.1370T>C                 | p.Ile457Thr         | LP | 2   |

|      |           |             |    |    |
|------|-----------|-------------|----|----|
| MYH7 | c.1436A>G | p.Asn479Ser | P  | 1  |
| MYH7 | c.1477A>G | p.Met493Val | P  | 1  |
| MYH7 | c.1479G>C | p.Met493Ile | LP | 1  |
| MYH7 | c.1491G>T | p.Glu497Asp | LP | 3  |
| MYH7 | c.1588A>G | p.Ile530Val | LP | 1  |
| MYH7 | c.1615A>C | p.Met539Leu | P  | 2  |
| MYH7 | c.161G>A  | p.Arg54Gln  | P  | 1  |
| MYH7 | c.1711G>C | p.Gly571Arg | P  | 2  |
| MYH7 | c.1727A>G | p.His576Arg | LP | 4  |
| MYH7 | c.1727A>G | p.His576Arg | P  | 2  |
| MYH7 | c.1742A>G | p.His581Arg | LP | 3  |
| MYH7 | c.1750G>A | p.Gly584Ser | P  | 4  |
| MYH7 | c.1750G>C | p.Gly584Arg | LP | 5  |
| MYH7 | c.1750G>C | p.Gly584Arg | P  | 14 |
| MYH7 | c.1759G>C | p.Asp587His | LP | 1  |
| MYH7 | c.1801C>T | p.Leu601Phe | LP | 1  |
| MYH7 | c.1807G>A | p.Glu603Lys | LP | 1  |
| MYH7 | c.1816G>A | p.Val606Met | P  | 15 |
| MYH7 | c.1820G>A | p.Gly607Asp | LP | 3  |
| MYH7 | c.1826A>G | p.Tyr609Cys | LP | 1  |
| MYH7 | c.1954A>G | p.Arg652Gly | LP | 6  |
| MYH7 | c.1954A>G | p.Arg652Gly | P  | 5  |
| MYH7 | c.1987C>T | p.Arg663Cys | LP | 7  |
| MYH7 | c.1987C>T | p.Arg663Cys | P  | 16 |
| MYH7 | c.1988G>A | p.Arg663His | LP | 3  |
| MYH7 | c.1988G>A | p.Arg663His | P  | 30 |
| MYH7 | c.2011C>T | p.Arg671Cys | P  | 2  |
| MYH7 | c.2069T>C | p.Met690Thr | LP | 2  |
| MYH7 | c.2069T>G | p.Met690Thr | P  | 1  |
| MYH7 | c.2080C>T | p.Arg694Cys | LP | 2  |
| MYH7 | c.2080C>T | p.Arg694Cys | P  | 7  |
| MYH7 | c.2087A>G | p.Asn696Ser | LP | 1  |
| MYH7 | c.208A>T  | p.Thr70Ser  | LP | 1  |
| MYH7 | c.2093T>C | p.Val698Ala | P  | 2  |
| MYH7 | c.2104A>G | p.Ile702Val | LP | 1  |
| MYH7 | c.2104A>G | p.Ile702Val | P  | 1  |
| MYH7 | c.2123G>C | p.Gly708Ala | LP | 2  |
| MYH7 | c.2129C>A | p.Pro710His | P  | 3  |
| MYH7 | c.2146G>A | p.Gly716Arg | LP | 3  |
| MYH7 | c.2146G>A | p.Gly716Arg | P  | 7  |
| MYH7 | c.2155C>G | p.Arg719Gly | P  | 1  |
| MYH7 | c.2155C>T | p.Arg719Trp | P  | 8  |
| MYH7 | c.2156G>A | p.Arg719Gln | P  | 15 |
| MYH7 | c.2156G>C | p.Arg719Pro | LP | 1  |
| MYH7 | c.2167C>G | p.Arg723Gly | LP | 4  |
| MYH7 | c.2167C>G | p.Arg723Gly | P  | 1  |
| MYH7 | c.2167C>T | p.Arg723Cys | LP | 1  |
| MYH7 | c.2167C>T | p.Arg723Cys | P  | 16 |
| MYH7 | c.2191C>G | p.Pro731Ala | LP | 1  |
| MYH7 | c.2191C>T | p.Pro731Ser | LP | 4  |
| MYH7 | c.2198G>A | p.Gly733Glu | P  | 2  |
| MYH7 | c.2201A>C | p.Gln734Pro | LP | 1  |
| MYH7 | c.2207T>C | p.Ile736Thr | LP | 4  |
| MYH7 | c.2207T>C | p.Ile736Thr | P  | 4  |
| MYH7 | c.2221G>A | p.Gly741Arg | LP | 1  |
| MYH7 | c.2221G>A | p.Gly741Arg | P  | 5  |

|      |                |              |    |    |
|------|----------------|--------------|----|----|
| MYH7 | c.2221G>C      | p.Gly741Arg  | LP | 3  |
| MYH7 | c.2221G>C      | p.Gly741Arg  | P  | 2  |
| MYH7 | c.2221G>T      | p.Gly741Trp  | LP | 2  |
| MYH7 | c.2221G>T      | p.Gly741Trp  | P  | 7  |
| MYH7 | c.2291T>A      | p.Phe764Tyr  | LP | 1  |
| MYH7 | c.2302G>A      | p.Gly768Arg  | LP | 1  |
| MYH7 | c.2302G>A      | p.Gly768Arg  | P  | 20 |
| MYH7 | c.2306C>T      |              | P  | 1  |
| MYH7 | c.2346C>A      | p.Ser782Arg  | LP | 5  |
| MYH7 | c.2347C>T      | p.Arg783Cys  | LP | 1  |
| MYH7 | c.2348G>A      | p.Arg783His  | LP | 1  |
| MYH7 | c.2389G>A      | p.Ala797Thr  | P  | 24 |
| MYH7 | c.2420G>A      | p.Arg807His  | LP | 1  |
| MYH7 | c.2432T>C      | p.Leu811Pro  | LP | 1  |
| MYH7 | c.2471T>C      | p.Val824Ala  | LP | 1  |
| MYH7 | c.2524A>G      | p.Ser842Gly  | LP | 1  |
| MYH7 | c.2539_2541del | p.Lys847del  | LP | 5  |
| MYH7 | c.2539A>G      | p.Lys847Glu  | LP | 2  |
| MYH7 | c.2539A>G      | p.Lys847Glu  | P  | 1  |
| MYH7 | c.2542_2544del | p.Glu848del  | LP | 1  |
| MYH7 | c.2543A>G      | p.Glu848Gly  | LP | 1  |
| MYH7 | c.2558del      | p.Gly853fs   | P  | 1  |
| MYH7 | c.2572C>A      | p.Arg858Ser  | P  | 1  |
| MYH7 | c.2572C>T      | p.Arg858Cys  | LP | 1  |
| MYH7 | c.2573G>C      | p.Arg858Pro  | LP | 1  |
| MYH7 | c.2593A>G      | p.Lys865Glu  | LP | 2  |
| MYH7 | c.2594A>G      | p.Lys865Arg  | LP | 3  |
| MYH7 | c.2605C>T      | p.Arg869Cys  | LP | 1  |
| MYH7 | c.2606G>A      | p.Arg869His  | LP | 5  |
| MYH7 | c.2606G>A      | p.Arg869His  | P  | 46 |
| MYH7 | c.2608C>T      | p.Arg870Cys  | LP | 1  |
| MYH7 | c.2609G>A      | p.Arg870His  | P  | 4  |
| MYH7 | c.2609G>T      | p.Arg870Leu  | LP | 1  |
| MYH7 | c.2623_2625del | p.Glu875del  | LP | 1  |
| MYH7 | c.2627_2629del | p.Lys876del  | LP | 1  |
| MYH7 | c.2631G>T      | p.Met877Ile  | P  | 1  |
| MYH7 | c.2644C>G      | p.Gln882Glu  | LP | 4  |
| MYH7 | c.2655T>A      | p.Asn885Lys  | LP | 1  |
| MYH7 | c.2681A>G      | p.Glu894Gly  | LP | 12 |
| MYH7 | c.2717A>G      | p.Asp906Gly  | P  | 6  |
| MYH7 | c.2722C>G      | p.Leu908Val  | P  | 12 |
| MYH7 | c.2723T>A      | p.Leu908Gln  | P  | 2  |
| MYH7 | c.2761G>A      | p.Glu921Lys  | LP | 1  |
| MYH7 | c.2770G>A      | p.Glu924Lys  | LP | 1  |
| MYH7 | c.2770G>A      | p.Glu924Lys  | P  | 3  |
| MYH7 | c.2782G>A      | p.Asp928Asn  | P  | 1  |
| MYH7 | c.2783A>T      | p.Asp928Val  | P  | 2  |
| MYH7 | c.2788G>C      | p.Glu930Gln  | P  | 2  |
| MYH7 | c.2893G>A      | p.Glu965Lys  | LP | 2  |
| MYH7 | c.2974C>A      | p.Leu992Met  | LP | 1  |
| MYH7 | c.3100-2A>C    |              | P  | 1  |
| MYH7 | c.3133C>T      | p.Arg1045Cys | LP | 2  |
| MYH7 | c.3133C>T      | p.Arg1045Cys | P  | 2  |
| MYH7 | c.3134G>A      | p.Arg1045His | P  | 1  |
| MYH7 | c.3170G>A      | p.Gly1057Asp | P  | 2  |
| MYH7 | c.3325A>G      | p.Lys1109Glu | LP | 2  |



|      |           |              |    |    |
|------|-----------|--------------|----|----|
| MYH7 | c.3346G>A | p.Glu1116Lys | P  | 2  |
| MYH7 | c.3358G>A | p.Glu1120Lys | LP | 1  |
| MYH7 | c.341T>C  | p.Ile114Thr  | LP | 1  |
| MYH7 | c.3455A>T | p.Glu1152Val | LP | 1  |
| MYH7 | c.350A>T  | p.Tyr117Phe  | LP | 1  |
| MYH7 | c.3645G>C | p.Gln1215His | LP | 1  |
| MYH7 | c.4031G>A | p.Arg1344Gln | LP | 2  |
| MYH7 | c.4052C>T | p.Thr1351Met | P  | 1  |
| MYH7 | c.4066G>A | p.Glu1356Lys | LP | 6  |
| MYH7 | c.4124A>G | p.Tyr1375Cys | LP | 1  |
| MYH7 | c.4130C>T | p.Thr1377Met | LP | 16 |
| MYH7 | c.4135G>A | p.Ala1379Thr | P  | 6  |
| MYH7 | c.428G>A  | p.Arg143Gln  | LP | 4  |
| MYH7 | c.428G>A  | p.Arg143Gln  | P  | 4  |
| MYH7 | c.4363G>T | p.Glu1455*   | P  | 1  |
| MYH7 | c.438G>T  | p.Lys146Asn  | P  | 2  |
| MYH7 | c.4402G>A | p.Glu1468Lys | LP | 1  |
| MYH7 | c.4487A>C | p.Glu1496Ala | P  | 1  |
| MYH7 | c.4571A>G | p.His1524Arg | LP | 1  |
| MYH7 | c.4807G>A |              | P  | 1  |
| MYH7 | c.4992C>A | p.Asn1664Lys | LP | 1  |
| MYH7 | c.505A>G  | p.Arg169Gly  | LP | 2  |
| MYH7 | c.5134C>T | p.Arg1712Trp | LP | 2  |
| MYH7 | c.5135G>A | p.Arg1712Gln | LP | 13 |
| MYH7 | c.5305C>A | p.Leu1769Met | P  | 1  |
| MYH7 | c.530C>T  | p.Thr177Ile  | P  | 1  |
| MYH7 | c.5344A>G | p.Met1782Val | LP | 1  |
| MYH7 | c.5606A>G | p.Asp1869Gly | LP | 1  |
| MYH7 | c.5696T>C | p.Val1899Ala | LP | 1  |
| MYH7 | c.596C>T  | p.Ala199Val  | P  | 2  |
| MYH7 | c.611G>A  | p.Arg204His  | LP | 8  |
| MYH7 | c.676G>A  | p.Ala226Thr  | LP | 1  |
| MYH7 | c.677C>T  | p.Ala226Val  | P  | 8  |
| MYH7 | c.697G>T  | p.Ala233Ser  | LP | 2  |
| MYH7 | c.715G>A  | p.Asp239Asn  | LP | 2  |
| MYH7 | c.715G>A  | p.Asp239Asn  | P  | 1  |
| MYH7 | c.745C>G  | p.Arg249Gly  | P  | 1  |
| MYH7 | c.746G>A  | p.Arg249Gln  | LP | 2  |
| MYH7 | c.746G>A  | p.Arg249Gln  | P  | 7  |
| MYH7 | c.755T>G  | p.Phe252Cys  | LP | 1  |
| MYH7 | c.788T>C  | p.Ile263Thr  | LP | 7  |
| MYH7 | c.809A>G  | p.Lys270Arg  | LP | 3  |
| MYH7 | c.872C>T  | p.Ser291Phe  | LP | 1  |
| MYH7 | c.909C>G  | p.Ile303Met  | LP | 1  |
| MYH7 | c.920C>A  | p.Pro307His  | LP | 1  |
| MYH7 | c.950A>G  | p.Glu317Gly  | LP | 1  |
| MYH7 | c.958G>A  | p.Val320Met  | LP | 10 |
| MYH7 | c.968T>A  | p.Ile323Asn  | LP | 3  |
| MYH7 |           | p.Arg452His  | P  | 1  |
| MYL2 | c.125G>A  | p.Gly42Asp   | LP | 2  |
| MYL2 | c.173G>A  | p.Arg58Gln   | LP | 1  |
| MYL2 | c.173G>A  | p.Arg58Gln   | P  | 8  |
| MYL2 | c.184A>T  | p.Lys62*     | LP | 1  |
| MYL2 | c.184A>T  | p.Lys62*     | P  | 1  |
| MYL2 | c.193G>A  | p.Glu65Lys   | LP | 1  |
| MYL2 | c.239C>A  | p.Thr80Asn   | LP | 3  |

|       |                |                 |    |    |
|-------|----------------|-----------------|----|----|
| MYL2  | c.286G>A       | p.Glu96Lys      | LP | 1  |
| MYL2  | c.45_46delinsT | p.Asn16Thrfs*34 | LP | 1  |
| MYL2  | c.482A>G       | p.His161Arg     | LP | 1  |
| MYL2  | c.484G>A       | p.Gly162Arg     | P  | 1  |
| MYL2  | c.58A>C        | p.Met20Leu      | LP | 3  |
| MYL2  | c.58A>C        | p.Met20Leu      | P  | 1  |
| MYL2  | c.64G>A        | p.Glu22Lys      | LP | 2  |
| MYL2  | c.64G>A        | p.Glu22Lys      | P  | 8  |
| MYL3  | c.170C>G       | p.Ala57Gly      | P  | 1  |
| MYL3  | c.435dup       | p.Gly146Trpfs*7 | LP | 1  |
| MYL3  | c.445A>G       | p.Met149Val     | P  | 1  |
| MYL3  | c.452C>T       | p.Ala151Val     | P  | 3  |
| MYL3  | c.461:G>A      | p.Arg154His     | P  | 1  |
| MYL3  | c.463C>G       | p.His155Asp     | LP | 1  |
| TNNI3 | c.114dup       | p.Ser39fs       | P  | 1  |
| TNNI3 | c.257_258del   | p.Ala86Glyfs*23 | P  | 2  |
| TNNI3 | c.356C>A       | p.Thr119Asn     | LP | 1  |
| TNNI3 | c.407G>A       | p.Arg136Gln     | P  | 1  |
| TNNI3 | c.422G>A       | p.Arg141Gln     | LP | 1  |
| TNNI3 | c.422G>A       | p.Arg141Gln     | P  | 2  |
| TNNI3 | c.433C>G       | p.Arg145Gly     | P  | 2  |
| TNNI3 | c.433C>T       | p.Arg145Trp     | LP | 2  |
| TNNI3 | c.433C>T       | p.Arg145Trp     | P  | 10 |
| TNNI3 | c.434G>A       | p.Arg145Gln     | LP | 2  |
| TNNI3 | c.434G>A       | p.Arg145Gln     | P  | 1  |
| TNNI3 | c.470C>T       | p.Ala157Val     | P  | 5  |
| TNNI3 | c.484C>T       | p.Arg162Trp     | LP | 5  |
| TNNI3 | c.485G>A       | p.Arg162Gln     | LP | 3  |
| TNNI3 | c.485G>A       | p.Arg162Gln     | P  | 6  |
| TNNI3 | c.485G>C       | p.Arg162Pro     | LP | 1  |
| TNNI3 | c.485G>C       | p.Arg162Pro     | P  | 1  |
| TNNI3 | c.497C>T       | p.Ser166Phe     | LP | 2  |
| TNNI3 | c.497C>T       | p.Ser166Phe     | P  | 2  |
| TNNI3 | c.509G>A       | p.Arg170Gln     | LP | 1  |
| TNNI3 | c.509G>A       | p.Arg170Gln     | P  | 1  |
| TNNI3 | c.526G>A       | p.Val176Met     | LP | 1  |
| TNNI3 | c.549G>T       | p.Lys183Asn     | LP | 1  |
| TNNI3 | c.557G>A       | p.Arg186Gln     | LP | 3  |
| TNNI3 | c.557G>A       | p.Arg186Gln     | P  | 13 |
| TNNI3 | c.568G>T       | p.Asp190Tyr     | LP | 1  |
| TNNI3 | c.575G>A       | p.Arg192His     | P  | 2  |
| TNNI3 | c.575G>T       | p.Arg192Leu     | LP | 1  |
| TNNI3 | c.581A>G       | p.Asn194Ser     | LP | 1  |
| TNNI3 | c.586G>A       | p.Asp196Asn     | LP | 1  |
| TNNI3 | c.592C>G       | p.Leu198Val     | LP | 13 |
| TNNI3 | c.592C>T       | p.Leu198Val     | LP | 1  |
| TNNI3 | c.611G>A       | p.Arg204His     | P  | 2  |
| TNNI3 | c.61C>T        | p.Arg21Cys      | P  | 1  |
| TNNI3 | c.626A>C       | p.Glu209Ala     | P  | 1  |
| TNNI3 |                | p.Leu197Val     | P  | 1  |
| TNNT2 | c.196A>C       | p.Lys66Gln      | LP | 1  |
| TNNT2 | c.236T>A       | p.Ile79Asn      | P  | 16 |
| TNNT2 | c.274C>T       | p.Arg92Trp      | P  | 9  |
| TNNT2 | c.275G>A       | p.Arg92Gln      | P  | 11 |
| TNNT2 | c.280C>T       | p.Arg94Cys      | P  | 1  |
| TNNT2 | c.281G>A       | p.Arg94His      | LP | 1  |

|       |              |             |    |    |
|-------|--------------|-------------|----|----|
| TNNT2 | c.304C>T     | p.Arg102Trp | P  | 1  |
| TNNT2 | c.330T>G     | p.Phe110Leu | LP | 6  |
| TNNT2 | c.388C>T     | p.Arg130Cys | P  | 4  |
| TNNT2 | c.421del     | p.Arg141fs  | P  | 1  |
| TNNT2 | c.487_489del | p.Glu163del | LP | 1  |
| TNNT2 | c.487_489del | p.Glu163del | P  | 10 |
| TNNT2 | c.517_519del | p.Glu173del | LP | 2  |
| TNNT2 | c.536C>T     | p.Ser179Phe | P  | 1  |
| TNNT2 | c.583G>A     | p.Glu195Lys | P  | 1  |
| TNNT2 | c.653T>C     | p.Ile218Thr | LP | 1  |
| TNNT2 | c.803A>T     | p.Asn268Ile | LP | 1  |
| TNNT2 | c.807C>A     | p.Asn269Lys | LP | 1  |
| TNNT2 | c.814C>T     | p.Gln272*   | LP | 1  |
| TNNT2 | c.833G>C     | p.Arg278Pro | P  | 2  |
| TNNT2 | c.853C>T     | p.Arg285Cys | P  | 10 |
| TNNT2 | c.856C>T     | p.Arg286Cys | LP | 1  |
| TNNT2 | c.856C>T     | p.Arg286Cys | P  | 7  |
| TNNT2 | c.860G>A     | p.Trp287*   | P  | 8  |
| TNNT2 | c.877C>T     | p.Arg293Cys | LP | 1  |
| TNNT2 | c.881G>A     | p.Trp294*   | LP | 2  |
| TPM1  | c.115-1G>C   |             | P  | 1  |
| TPM1  | c.184G>C     | p.Glu62Gln  | P  | 4  |
| TPM1  | c.428T>G     | p.Ile143Ser | LP | 1  |
| TPM1  | c.457C>G     | p.His153Asp | LP | 2  |
| TPM1  | c.523G>A     | p.Asp175Asn | P  | 3  |
| TPM1  | c.548C>T     | p.Ala183Val | LP | 2  |
| TPM1  | c.574G>A     | p.Glu192Lys | LP | 1  |
| TPM1  | c.574G>A     | p.Glu192Lys | P  | 5  |
| TPM1  | c.62G>T      | p.Arg21Leu  | LP | 1  |
| TPM1  | c.637A>C     |             | P  | 1  |
| TPM1  | c.64G>A      | p.Ala22Thr  | P  | 2  |
| TPM1  | c.655G>A     | p.Asp219Asn | LP | 1  |
| TPM1  | c.73G>A      | p.Ala25Thr  | LP | 1  |
| TPM1  | c.842T>C     | p.Met281Thr | LP | 1  |
| TPM1  | c.842T>C     | p.Met281Thr | P  | 2  |

**Supplemental Table 2:** Cumulative Incidence of Overall Composite Endpoint, Heart Failure, Ventricular Arrhythmias, and Atrial Fibrillation in Childhood-Onset HCM

|                               | <b>KM Rates (95% CI) at Varying Follow Up Intervals (yrs)</b> |                     |                      |                       |                       |                       |                       |
|-------------------------------|---------------------------------------------------------------|---------------------|----------------------|-----------------------|-----------------------|-----------------------|-----------------------|
|                               | <b>0</b>                                                      | <b>1</b>            | <b>5</b>             | <b>10</b>             | <b>15</b>             | <b>20</b>             | <b>25</b>             |
| <b>Overall Composite</b>      | 2.6%<br>(1.9, 3.6)                                            | 5.3%<br>(4.2, 6.7)  | 10.6%<br>(8.8, 12.6) | 18.6%<br>(16.0, 21.7) | 29.6%<br>(25.9, 33.7) | 40.7%<br>(36.1, 45.7) | 48.9%<br>(43.7, 54.4) |
| <b>Heart Failure</b>          | 0.5%<br>(0.002,1.0)                                           | 1.3%<br>(0.77,2.1)  | 3.1%<br>(2.2, 4.5)   | 6.6%<br>(5.0, 8.7)    | 10.3%<br>(8.0, 13.3)  | 16.6%<br>(13.2, 20.8) | 21.9%<br>(0.18, 0.27) |
| <b>Ventricular Arrhythmia</b> | 3.4%<br>(2.5, 4.5)                                            | 4.6%<br>(3.6, 5.9)  | 6.2%<br>(4.9, 7.7)   | 8.8%<br>(7.1, 10.9)   | 12.3%<br>(9.9, 15.2)  | 14.7%<br>(11.8, 18.2) | 16.9%<br>(13.5, 21.0) |
| <b>Atrial Fibrillation</b>    | 1.1%<br>(0.65, 1.9)                                           | 1.2%<br>(0.72, 2.0) | 2.8%<br>(1.9, 4.1)   | 5.9%<br>(4.3, 8.0)    | 11.7%<br>(9.1, 15.1)  | 19.8%<br>(15.9, 24.5) | 26.8%<br>(21.8, 32.5) |

**Supplemental Figure 1: Clinical Outcomes in Infant-Onset (<1 yo) vs Childhood-Onset (1-18 yo) HCM**

**a) Overall composite**

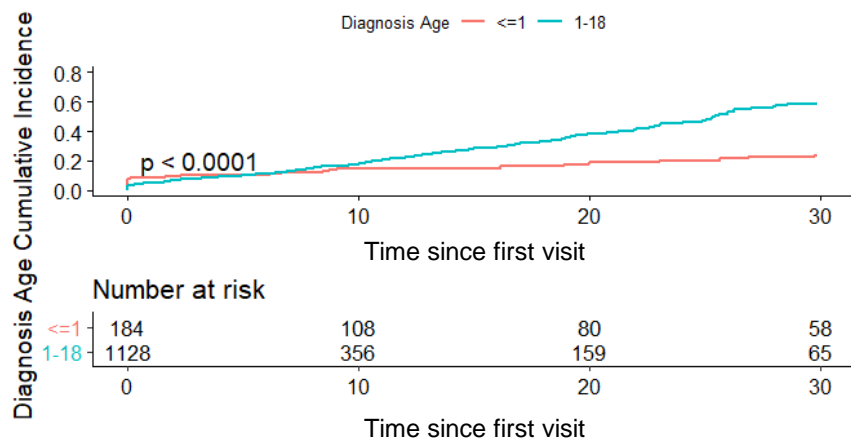

**b) Heart Failure**

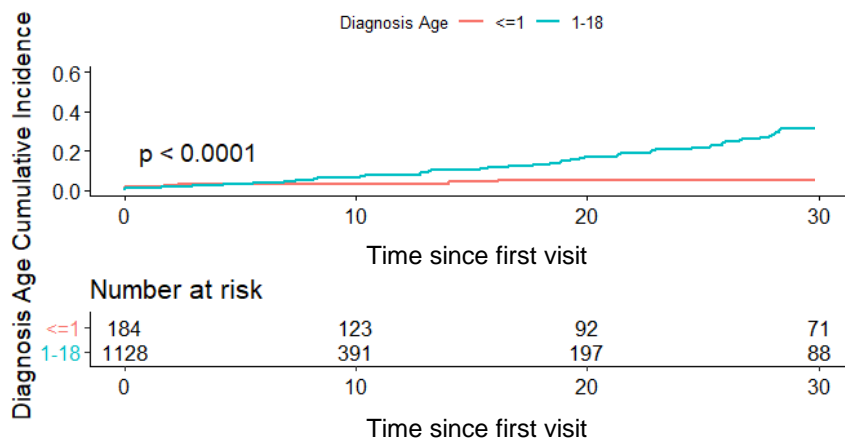

**c) Ventricular Arrhythmia**

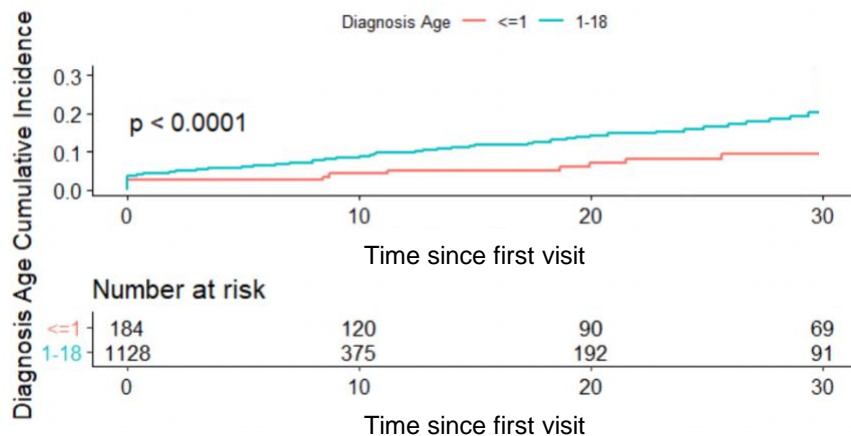

**d) Atrial Fibrillation**

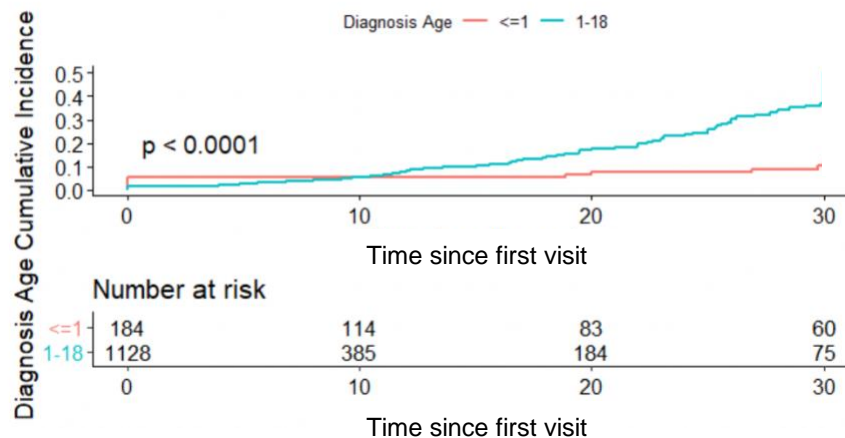

**Supplemental Figure 2: Clinical Outcomes by Sarcomere Status in Childhood-Onset HCM (1-18 yo)**

**a) Overall Composite Outcome**

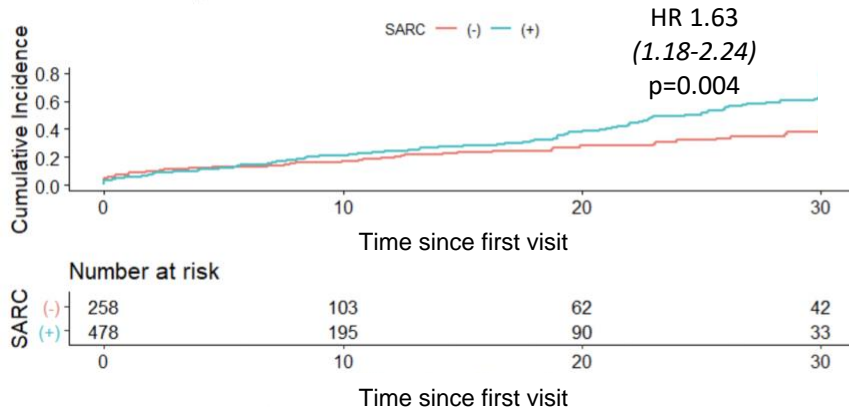

**b) HF composite**

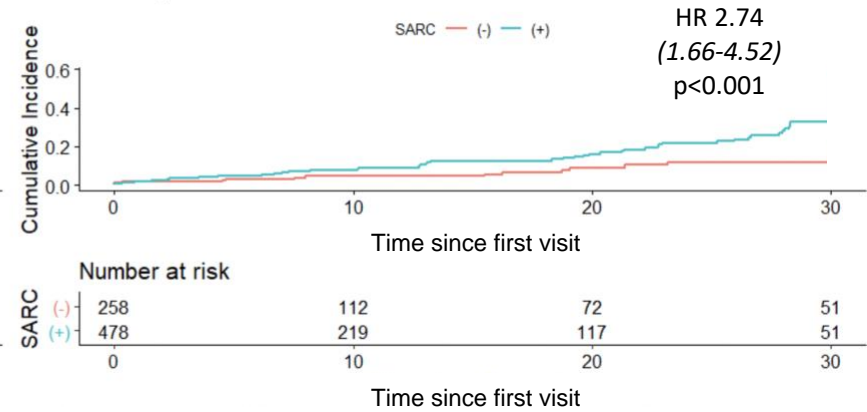

**c) VA composite**

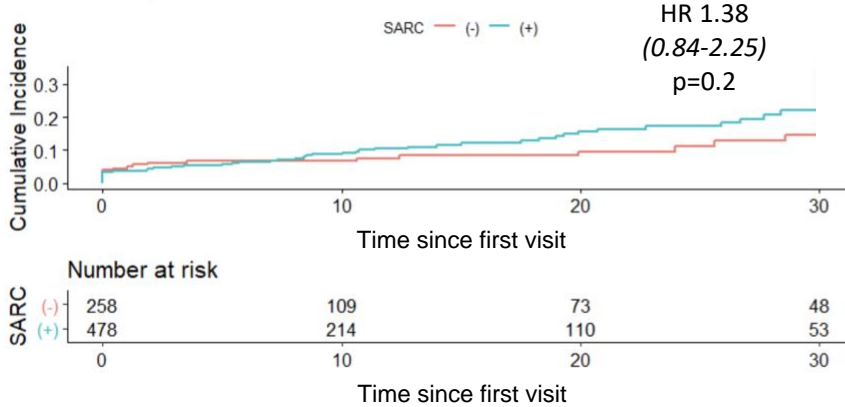

**d) AFib composite**

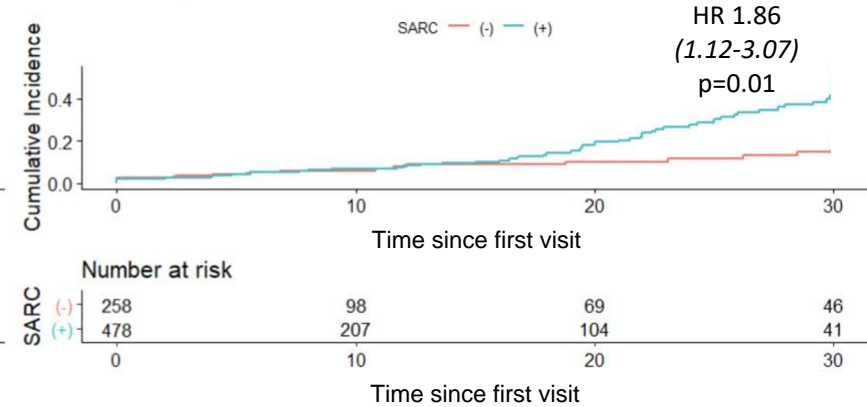

### Supplemental Figure 3: Composite Outcome by Sex in Childhood-Onset HCM (1-18 yo)

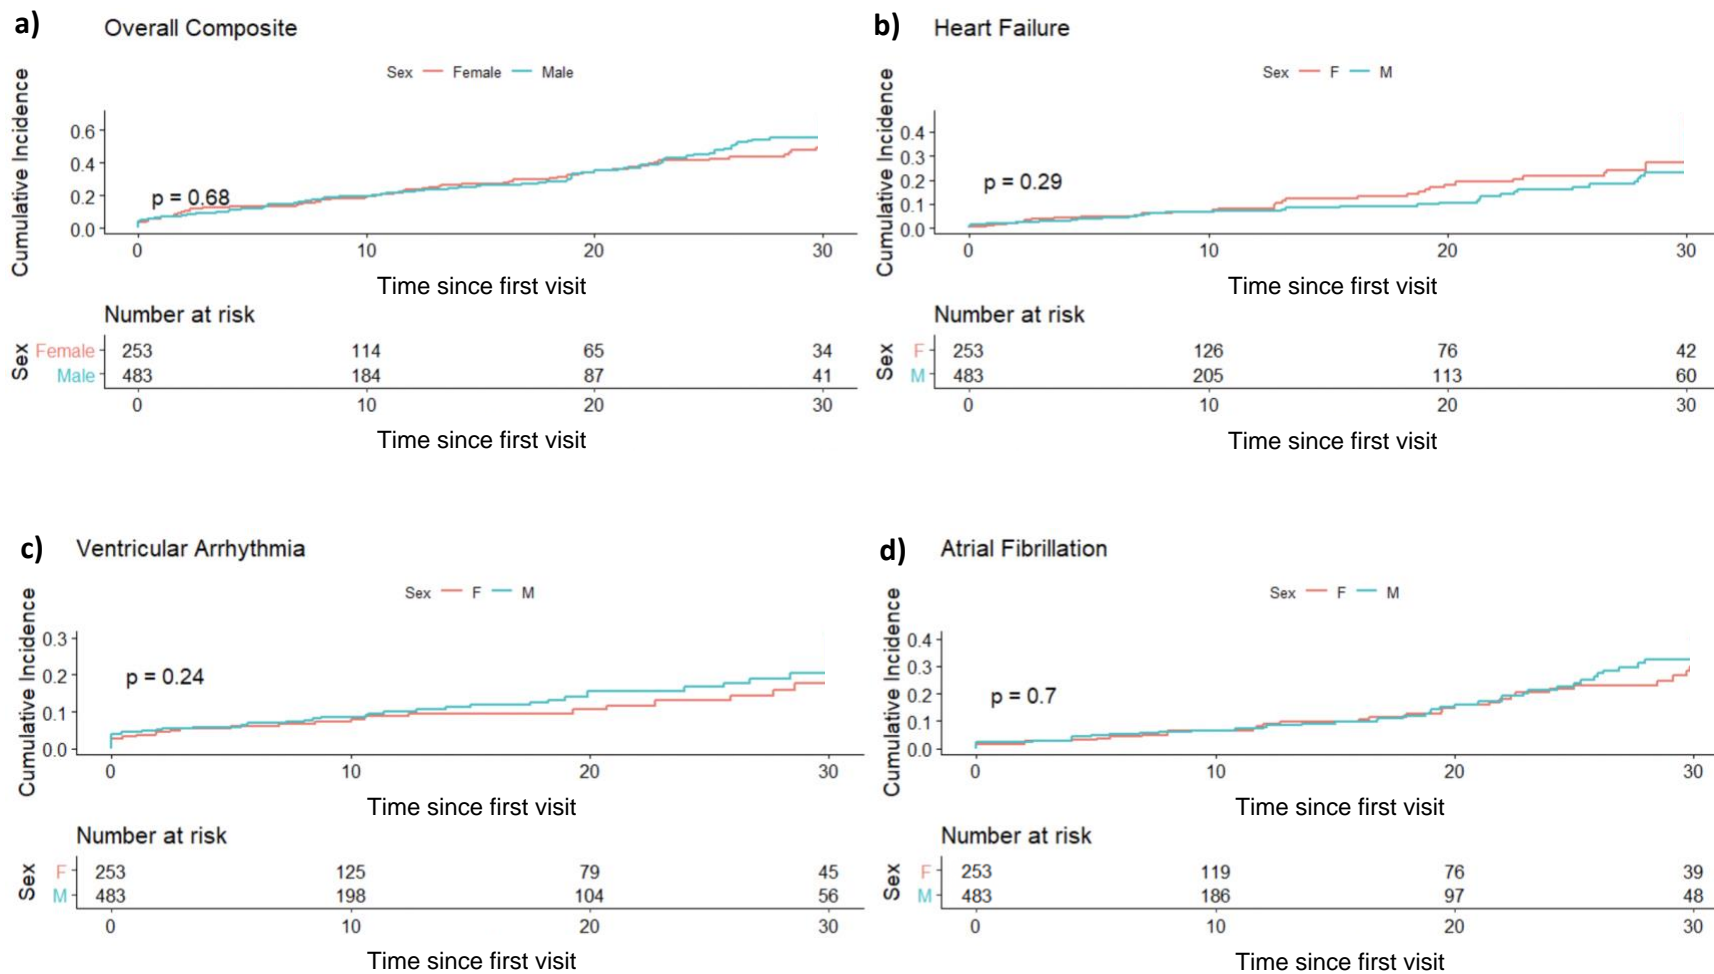

**Supplemental Figure 4:** Comparison of Outcomes in Childhood-Onset (n=617) vs. Adult-Onset HCM stratified by age (a) 19-39 (n=1250) and (b) >=40 (n=2529)

**a)**

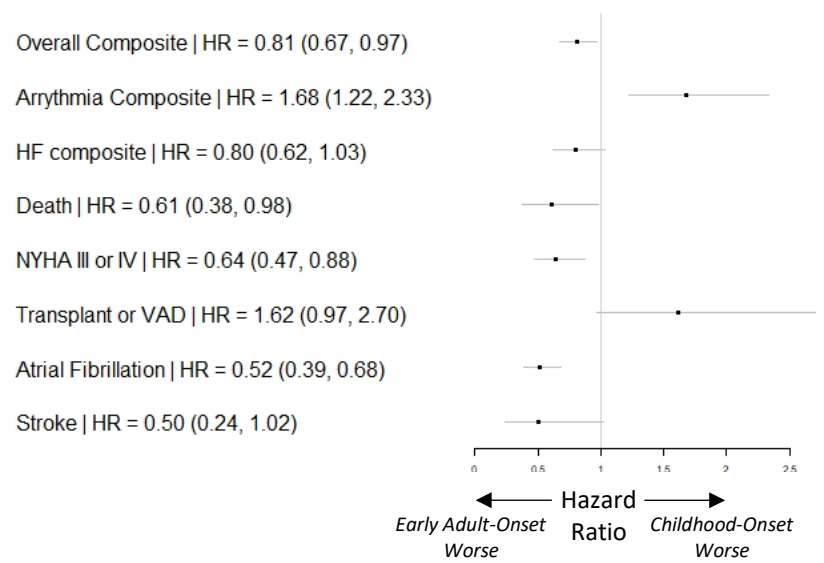

**b)**

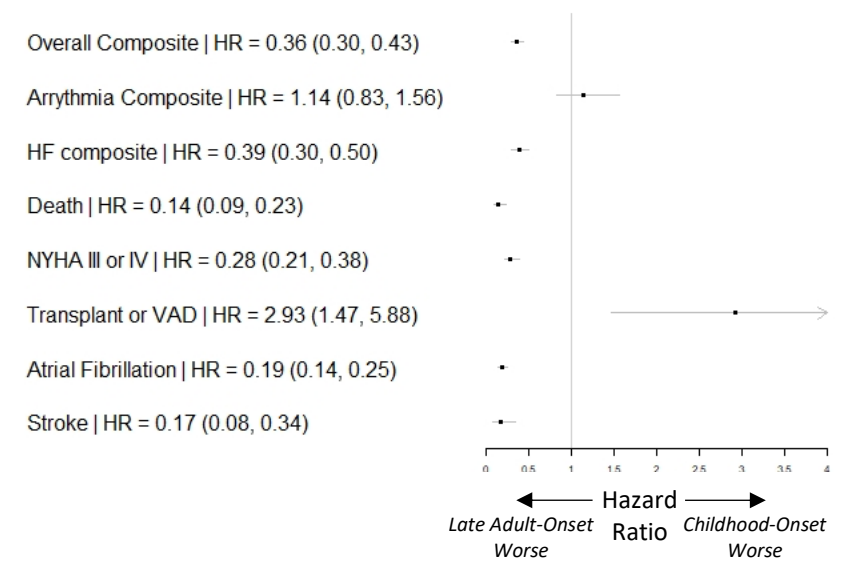

*Adjusted for sex, proband status, sarcomere status, and age at diagnosis*



**Supplemental Figure 5:** Comparison of Outcomes in Childhood-Onset Sarcomeric (n=382) vs. non-Sarcomeric HCM (n=151)

Overall Composite | HR = 1.67 (1.16, 2.41)

Ventricular Arrhythmia | HR = 1.22 (0.71, 2.08)

HF composite | HR = 2.39 (1.36, 4.20)

Death | HR = 1.63 (0.93, 2.87)

NYHA III or IV | HR = 2.18 (1.06, 4.50)

Transplant or VAD | HR = 1.11 (0.44, 2.79)

Atrial Fibrillation | HR = 1.36 (0.78, 2.39)

Stroke | HR = 3.72 (0.48, 29.10)

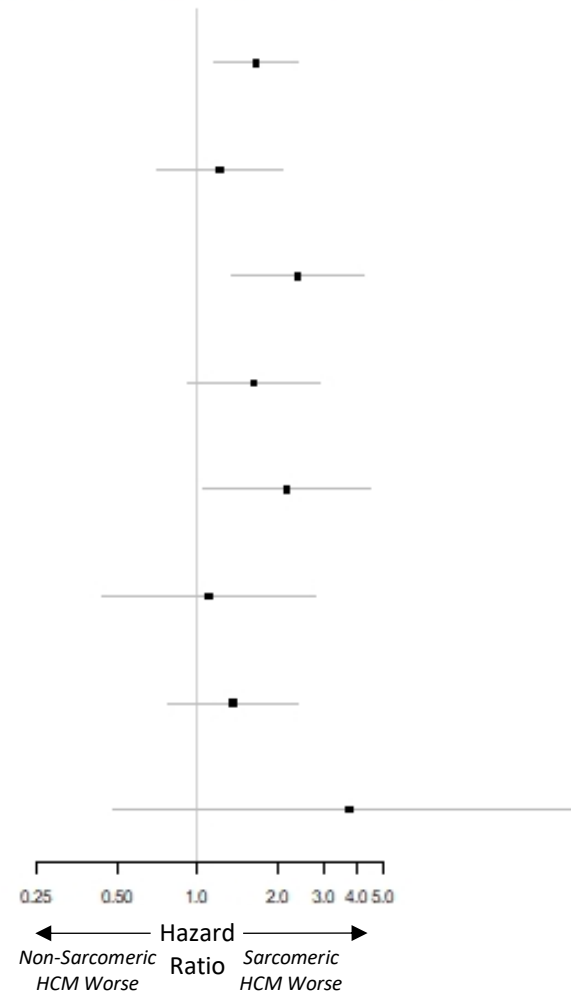

*Adjusted for sex, proband status, and age at diagnosis*

**Supplemental Figure 6:** Comparison of Outcomes in Adult-Onset Sarcomeric (n=1992) vs. non-Sarcomeric HCM (n=1787)

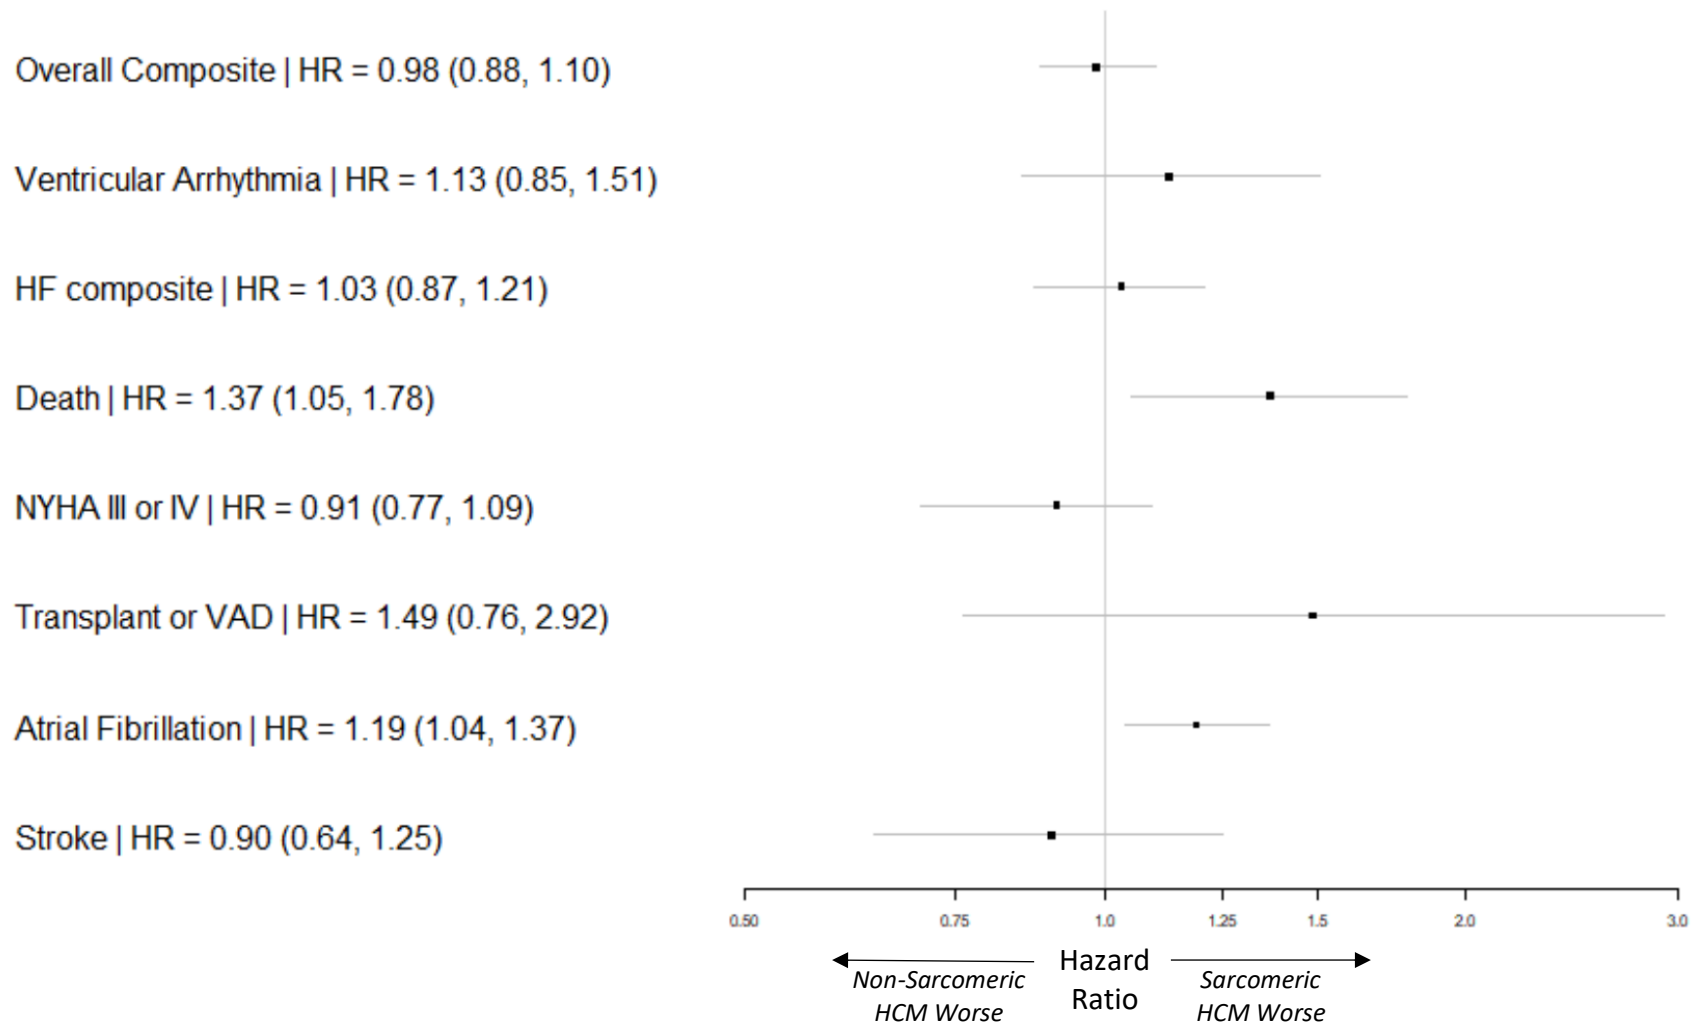

*Adjusted for sex, proband status, and age at diagnosis*

### Supplemental Figure 7: Analysis of Outcomes by Age of Diagnosis as a Continuous Variable

We examined potentially nonlinear relationships between continuous age and the log hazard ratio of each outcome, along with corresponding 95% confidence intervals (smoothHR package in R). Each of these models is adjusted for sex, proband status, and sarcomere status. The results are consistent with Supplemental Figure 4, with childhood-onset HCM being associated with increased risk of the Ventricular Arrhythmia composite and transplant/VAD, and lower risk of heart failure, atrial fibrillation, and the overall composite.

#### a) Overall composite:

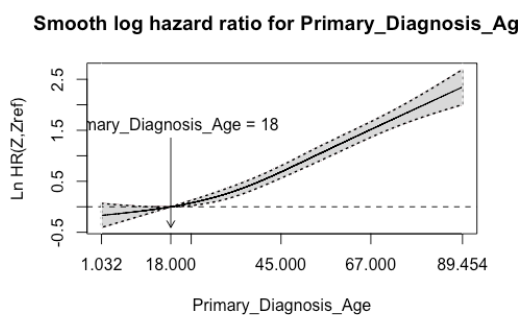

#### b) VA composite:

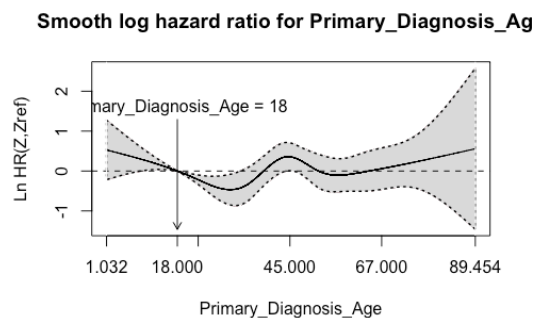

#### c) HF composite:

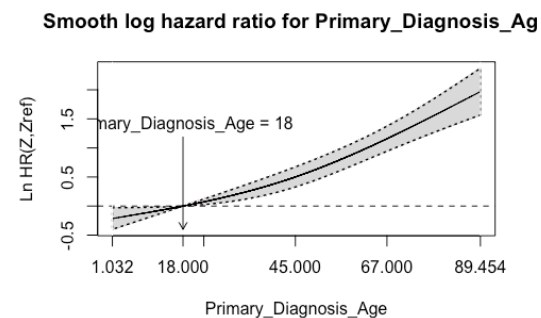

#### d) Transplant/VAD:

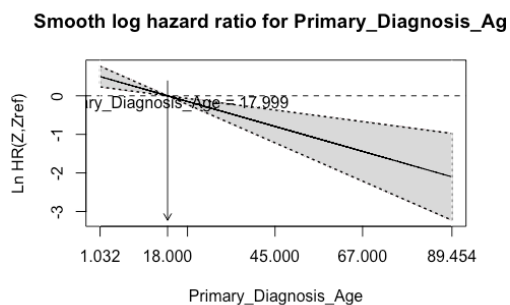

#### e) AFib:

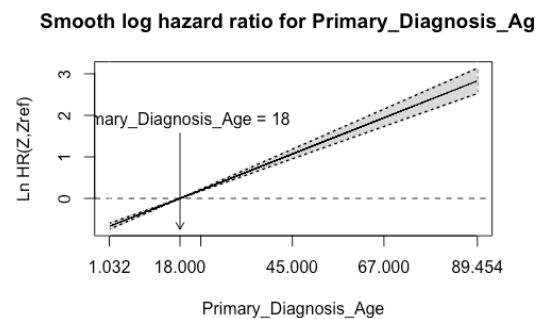

Supplement: ehab148_supplementary_appendix.pdf [file ehab148_supplementary_appendix.pdf]
